# Supplementary material for: Synthesis of 5-hydroxymethylfurfural from monosaccharides catalyzed by superacid VNU-11–SO4 in 1-ethyl-3-methylimidazolium chloride ionic liquid
Source: Royal Society of Chemistry journal article supplement (doi:10.1039/d0ra08261a), 2020-01-01
Supplement: d0ra08261a1.pdf [file d0ra08261a1.pdf]

*Supporting information*

**Synthesis of 5-hydroxymethylfurfural from monosaccharides catalyzed by superacid VNU-11-SO<sub>4</sub> in [Emim]Cl ionic liquid**

*Linh Ho Thuy Nguyen<sup>a,b,c,‡</sup>, Huong Thi Vo<sup>a,c,‡</sup>, Ha Bich Phan,<sup>a,b,d,‡</sup> Minh Huy Dinh Dang<sup>a,b,c</sup>, Tan Le Hoang Doan<sup>b,c\*</sup>, Phuong Hoang Tran<sup>a,c\*</sup>*

*<sup>a</sup>Department of Organic Chemistry, Faculty of Chemistry, University of Science, Ho Chi Minh City, 721337, Vietnam*

*<sup>b</sup>Center for Innovative Materials and Architectures (INOMAR), Ho Chi Minh City, 721337, Vietnam*

*<sup>c</sup>Viet Nam National University-Ho Chi Minh City, Ho Chi Minh City, 721337, Vietnam*

*<sup>d</sup>Institute of Public Health, Ho Chi Minh City, 700000, Vietnam.*

*<sup>‡</sup> These authors contributed equally.*

Corresponding author: [thphuong@hcmus.edu.vn](mailto:thphuong@hcmus.edu.vn) (Phuong Hoang Tran), [dlhtan@inomar.edu.vn](mailto:dlhtan@inomar.edu.vn) (Tan Le Hoang Doan)

**Table of Contents**

|                                                               |           |
|---------------------------------------------------------------|-----------|
| <b>Section S1. Materials and General Methods.....</b>         | <b>S2</b> |
| <b>Section S2. Preparation of MOFs.....</b>                   | <b>S3</b> |
| <b>Section S3. Preparation of Deep eutectic solvents.....</b> | <b>S4</b> |
| <b>Section S4. Catalytic study.....</b>                       | <b>S5</b> |
| <b>Section S5. NMR data and spectra.....</b>                  | <b>S9</b> |

## Section S1: Materials and General Methods

### Materials

1,3,5-benzenetricarboxylic acid (H<sub>3</sub>BTC, purity > 95%), hafnium chloride (HfCl<sub>4</sub>, purity >98%), hydrofluoric acid (HF, 48 wt% in water), anhydrous chloroform with amylenes as stabilizer (CHCl<sub>3</sub>, purity > 99%), were obtained from Sigma-Aldrich Chemical Company. *N,N*-dimethylformamide (DMF, purity > 99%), choline chloride (97%), [EMIM]Cl (99%), ethylene glycol (99%), phenol (99%), zinc chloride (99%) were obtained from Acros Organics. Formic acid (HCOOH, purity > 98 and silica gel 230–400 mesh for flash chromatography, TLC plates (silica gel 60 F254), anhydrous dichloromethane (CH<sub>2</sub>Cl<sub>2</sub>, 99%), anhydrous ethyl acetate (EtOAc, purity ≥ 99%), acetone, and n-hexane (purity ≥ 99.5%) were obtained from Merck. Deuterated solvents, CDCl<sub>3</sub>, acetone-d<sub>6</sub> and DMSO-d<sub>6</sub>, were purchased from Cambridge Isotope Laboratories (Andover, MA). Ethyl acetate (99%), hexane (98%), D-glucose (99%), D-fructose (99%) were obtained from Fisher. All chemicals were used without further purification.

Methanol, acetonitrile from J.T.Baker (HPLC grade). Sulfuric acid (95-97 %) from Merck. HMF (99 %) was obtained from Aldrich. The water was purified with a water purification system (Smart2pure – Thermo Scientific).

### General methods

Powder X-ray diffraction (PXRD) patterns were recorded using a D8 Advance diffractometer equipped with a LYNXEYE detector (Bragg-Brentano geometry, Cu K $\alpha$  radiation  $\lambda = 1.54056 \text{ \AA}$ ). Fourier transform infrared (FT-IR) spectra were measured on a Bruker E400 FT-IR spectrometer using potassium bromide pellets. Low-pressure N<sub>2</sub> adsorption measurements were carried out on a Quantachrome Autosorb iQ volumetric gas adsorption analyzer. A liquid N<sub>2</sub> bath was used for measurements at 77 K. Helium was used as an estimation of dead space. Ultrahigh-purity-grade N<sub>2</sub>, and He (99.999% purity) were used throughout adsorption experiments. Solution NMR spectra were acquired on a Bruker Advance-500 MHz NMR spectrometer. ICP-MS analyses were performed on a PerkinElmer NexION 350X. HPLC analyses of HMF were recorded on Agilent Technologies 1260 Infinity high-performance liquid chromatography InertSustain C18 (4.6 x 150 mm) column, the size of particles is 5  $\mu\text{m}$ , equipped with a UV photodiode array detector. Fructose conversion was analyzed by Shimadzu LC-20ADXR high-performance liquid chromatography with InertSustain NH2 (4.6  $\times$  250 mm) column, the size of particles is 5  $\mu\text{m}$ ,

equipped with an evaporative light scattering detector – ELSD Alltech 3300: temperature 90 °C, air flow 2.5 L/min, gain 2. A combination of CH<sub>3</sub>CN (80%) and H<sub>2</sub>O (20%) was used as the mobile phase at a flow rate of 1.0 mL min<sup>-1</sup>. HRMS (ESI) data were collected using Sciex X500R QTOF.

## Section S2. Preparation of MOF

MOFs were synthesized using literature methods and characterization data were in good agreement with those previously reported.

**Microcrystalline powder sample of VNU-11:** A mixture of H<sub>3</sub>BTC (2.50 mmol, 537 mg) and HfOCl<sub>2</sub>·8H<sub>2</sub>O (7.50 mmol, 3.10 g) were dissolved in DMF/formic acid (160 mL/160 mL) and placed in a 500 mL screw-capped glass jar, which was heated to 120 °C for three days. A white precipitate was collected by filtration and washed three times with 100 mL of fresh DMF and immersed in 100 mL DMF for three days, during which time the DMF was replaced three times per day. The DMF-exchanged compound was filtrated off and immersed in 100 mL of water for three days, during which time the water was replaced three times per day. Water exchanged material was then immersed in 100 mL of anhydrous acetone for three days, during which time the acetone was replaced three times per day. The acetone-exchanged sample was then evacuated at room temperature for 24 h and at 150 °C for 24 h to yield activated sample (Yield: 2.30 g, 74% based on HfOCl<sub>2</sub>·8H<sub>2</sub>O).

**Microcrystalline powder sample of VNU-11-SO<sub>4</sub>:** Activated VNU-11 microcrystalline powder (200 mg, 0.109 mmol) was immersed in 20 mL of 0.1 M sulfuric acid (2.00 mmol) for 24 h during which time the mixture was stirred about once every two hours. The solid material was thoroughly washed with deionized water (3 x 20 mL per day for three days total), quickly exchanged with 5 x 20 mL anhydrous acetone. To obtain guest-free material, VNU-11-SO<sub>4</sub> was immersed in anhydrous chloroform (3 x 20 mL per day over a total of three days). The solvent exchanged sample was activated under vacuum for 24 h at room temperature and 24 h at 150 °C to get activated VNU-11-SO<sub>4</sub> (Yield 195 mg).

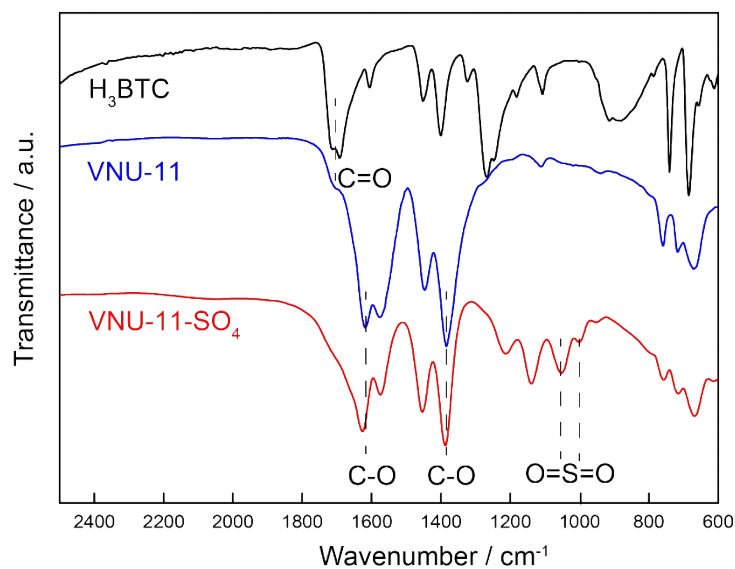

**Figure S1.** FT-IR spectra of the activated of VNU-11 and VNU-11-SO<sub>4</sub> compound

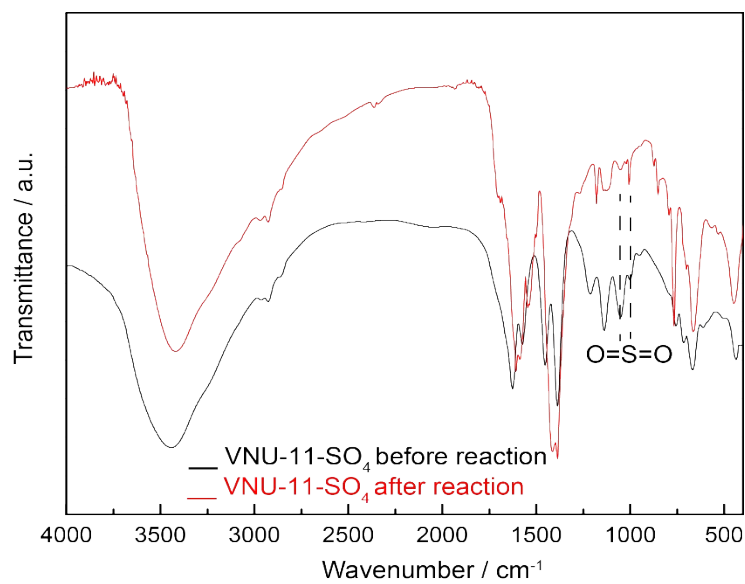

**Figure S2.** Infrared spectra of VNU-11-P-SO<sub>4</sub> before (black) and after (red) synthesis of HMF

### **Section S3. Preparation of deep eutectic solvent**

#### **Deep eutectic solvent between choline chloride and phenol**

The amount of choline chloride and phenol was carried out at a 1:4 ratio. The reaction was heated by a magnetic stirrer at 110 °C for 2 h until a homogeneous colorless liquid was formed, which was used directly for the reactions without purification.

#### **Deep eutectic solvent between choline chloride and ethylene glycol**

The amount of choline chloride and ethylene glycol was carried out at a 1:2 ratio. The reaction was heated by magnetic stirrer at 110 °C for 2 h until a homogeneous colorless liquid was formed, which was used directly for the reactions without purification.

## Section S4. Catalytic study

### *Building a standard curve of HMF*

30 mg of HMF was dissolved in 3 mL of water to obtain the solution having 10000 ppm concentration. The obtained solution was diluted to the standard solution having 1000 ppm and 50 ppm concentration. Determining the concentration of HMF in experimental samples: 2 mL of distilled water was added to dissolve the sample in the vial. The sample was filtered by 0.45  $\mu\text{m}$  membrane then the obtained solution was moved to 1.5 mL HPLC vial and analyzed by HPLC system at  $\lambda_{\text{max}} = 210 \text{ nm}$ ,  $\lambda_{\text{max}} = 285 \text{ nm}$ . After that, standard samples were analyzed by HPLC system at  $\lambda_{\text{max}} = 210 \text{ nm}$ ,  $\lambda_{\text{max}} = 285 \text{ nm}$ .

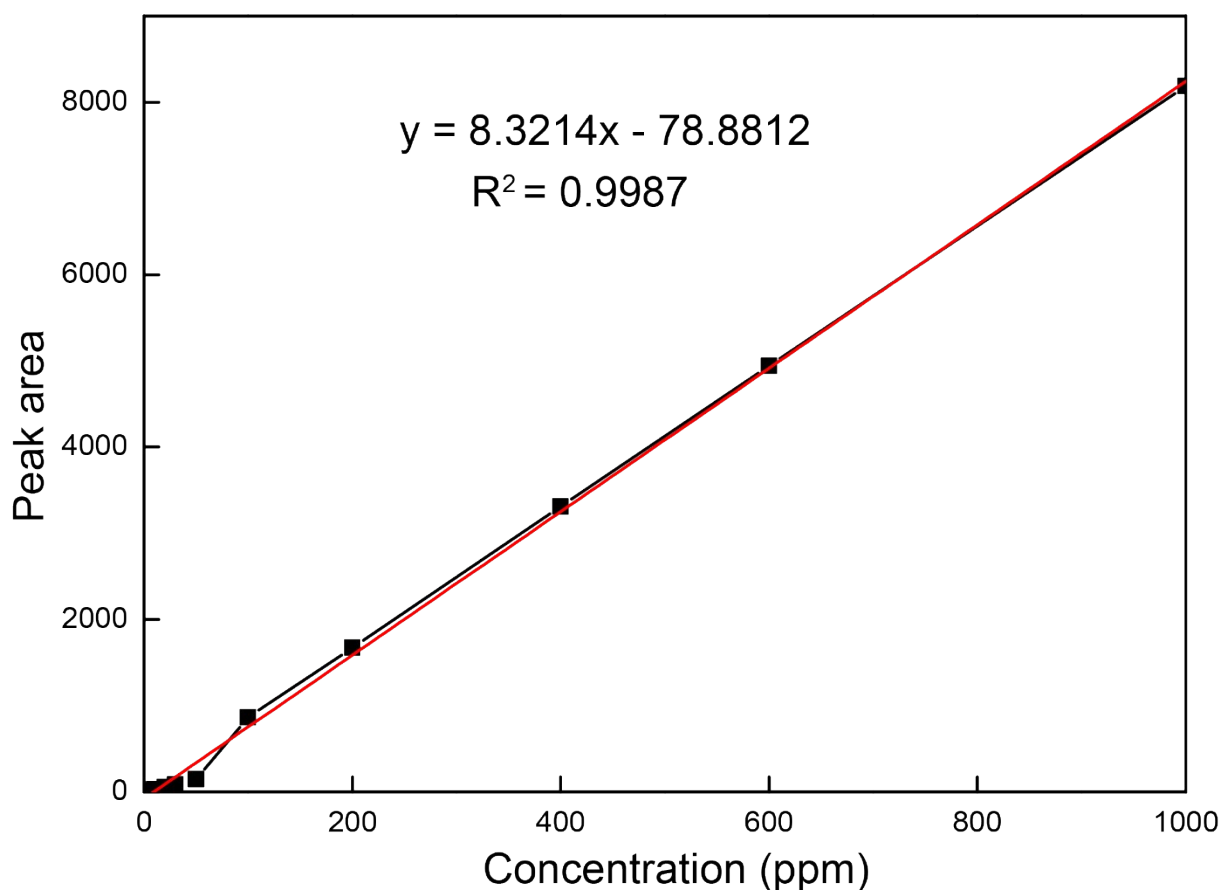

**Figure S3.** Standard concentration of HMF

### ***Building a standard curve of glucose conversion***

30 mg of glucose was dissolved in 3 mL of water to obtain the solution having 10000 ppm concentration. The obtained solution was diluted to a standard solution having 1000 ppm and 50 ppm concentration. It is the same as the method of building standard curve of HMF. Determining the glucose conversion in experimental samples: 5 mL of distilled water was added to dissolve sample. Next, distilled water was added to 10 mL of solution. The sample was filtered by 0.45  $\mu\text{m}$  membrane then the obtained solution was moved to 1.5 mL HPLC vial.

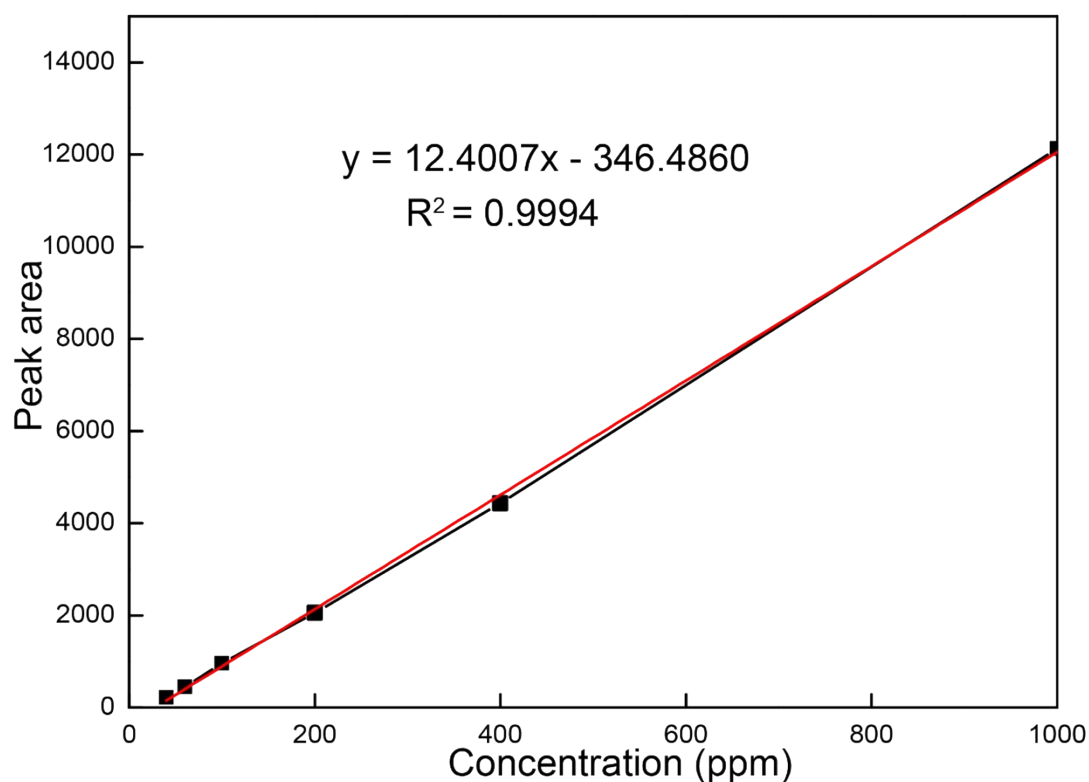

**Figure S4.** Standard concentration of standard glucose solutions

### ***Building a standard curve of Fructose conversion***

It is the same as the method of building standard curve of glucose conversion. Determining the fructose conversion in experimental samples: 5 mL of distilled water was added to dissolve

sample. Next, distilled water was added to 10 mL of solution. The sample was filtered by 0.45  $\mu\text{m}$  membrane; then the obtained solution was moved to 1.5 mL HPLC vial.

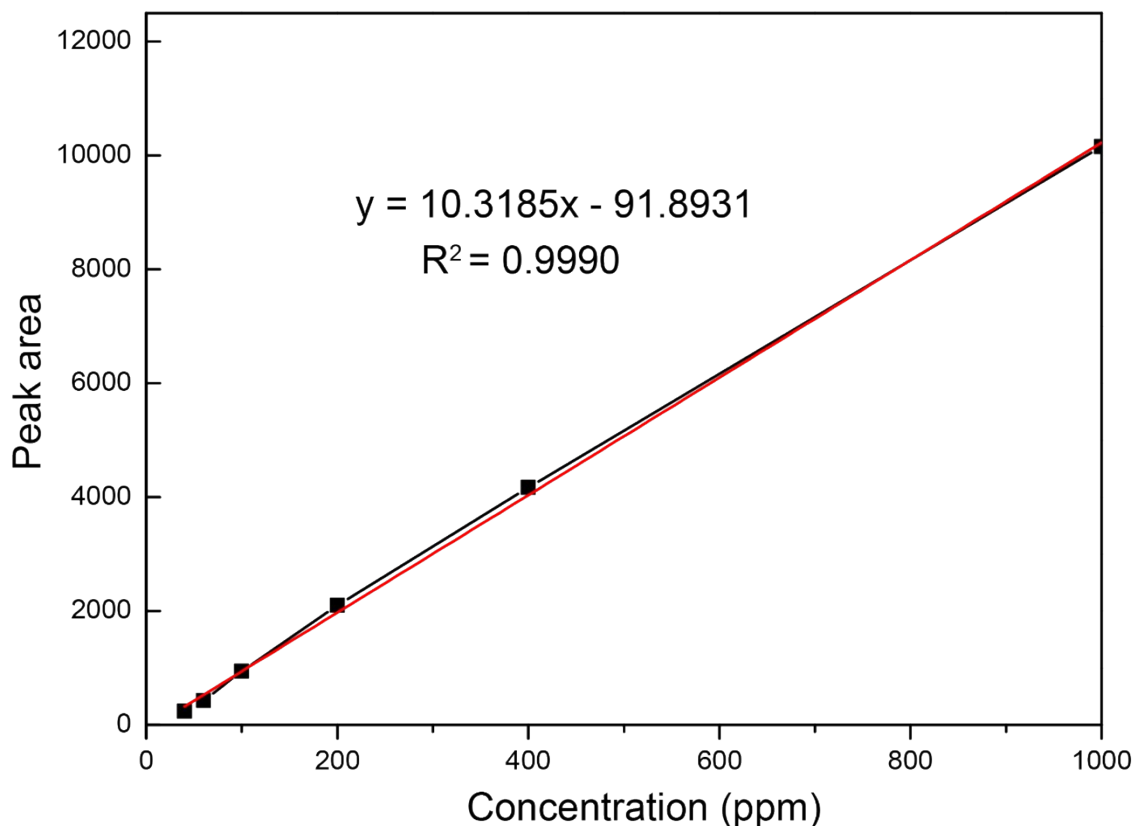

**Figure S5.** Standard concentration of standard Fructose solutions

#### ***Procedure for the synthesis of HMF***

In a typical experiment, Glucose or Fructose (1 mmol) was dissolved in [EMIM]Cl (6 mmol) and then VNU-11-P-SO<sub>4</sub> catalyst (20 mg) was added. The flask was heated to 110 °C in a magnetic stirrer with an oil bath, and conditions were maintained for 24 h. Samples were taken from the reaction mixture at specified times for HPLC analysis to determine HMF yield and fructose conversion.

After finishing the reaction, a mixture including HMF was extracted from the reaction mixture with ethyl acetate. HMF can be highly soluble in both water and organic solvents so it is moved absolutely into the water phase, while the remaining impurities are kept in an organic solvent. Next, HMF was extracted again from the reaction mixture with ethyl acetate. HMF will be



transferred into ethyl acetate so that excessive fructose is retained in the water. Pure HMF is achieved after evaporating Ethyl acetate. HMF obtained were characterized by <sup>1</sup>H NMR method and have been identified by the comparison of the spectral data with those reported.

Distilled water was added to the flask after extracting HMF. Shaking the flask to dissolve the remaining mixture. Next, the insoluble material was filtered to separate the catalyst. The catalyst was washed with distilled water and reactivated in the vacuum at 150 °C in 12 h. The obtained catalyst was characterized by PXRD, IR spectroscopy and identified by the comparison of the spectral data with those reported.

### *Analysis of the products*

The yield of HMF were determined by using an Agilent Technologies 1260 Infinity high performance liquid chromatography with photodiode array detector (HPLC – PAD). The analytical column applied is InertSustain C18 (5 μm, 4.6 x 150 mm). The mobile phase was a mixture of A methanol and B 2.5 mM sulfuric acid aqueous solution at 0.7 mL min<sup>-1</sup> in a 25 min, gradient as follows: 0 – 2.50 min, 100 - 100% B; 2.50 - 2.51 min, 100 - 85% B; 2.51 – 17.00 min, 85 - 85% B; 17.00 – 17.01 min, 85 -100 % B; 17.01 – 25.00 min, 100 -100 % B. For the analysis of fructose and glucose conversion, a Shimadzu LC-20ADXR high performance liquid chromatography with evaporative light scattering detector – ELSD Alltech 3300 (HPLC–ELSD) and an InertSustain NH<sub>2</sub> (5 μm, 4.6 x 250 mm) column. Operating conditions: Pump: isocratic, flowrate = 1.0 mL/min; Injection volume: 10 μL; Mobile Phase: ACN (80%) and H<sub>2</sub>O (20%); ELSD: temperature 90 °C, air flow 2.5 L/min, gain 2). The fructose conversion and HMF yield were calculated based on external standard curves constructed with authentic standards.

HRMS (ESI) analysis was used to confirm the exact mass of HMF. The system conditions were set as follows: Ion source gas 1: 40 psi; Ion source gas 2: 60 psi; Curtain gas: 30 psi; CAD gas: 7 psi; Source temperature: 500oC; Experiment: IDA (Information Dependent Acquisition Scanning); Spray voltage: 500 V (Positive) and -500 V (Negative); Declustering potential (DP): 80 V; Collision energy (CE): 10 V. The LC paramaters: inject volume: 5 μL; The mobile phase was A conc.: 40% (MeOH) and B conc.: 60% (HCOOH 0.1%, HCOONH<sub>4</sub> 5mM); Flow: 0.3 ml/min.

## Section S5: NMR, HRMS, HPLC data and spectra

### 5- Hydroxymethylfurfural

$^1\text{H}$  NMR (500 MHz,  $\text{CDCl}_3$ )  $\delta$  9.58 (s, 1H), 7.21 (d,  $J = 3.5$  Hz, 1H), 6.51 (d,  $J = 3.5$  Hz 1H), 4.71 (s, 2H).

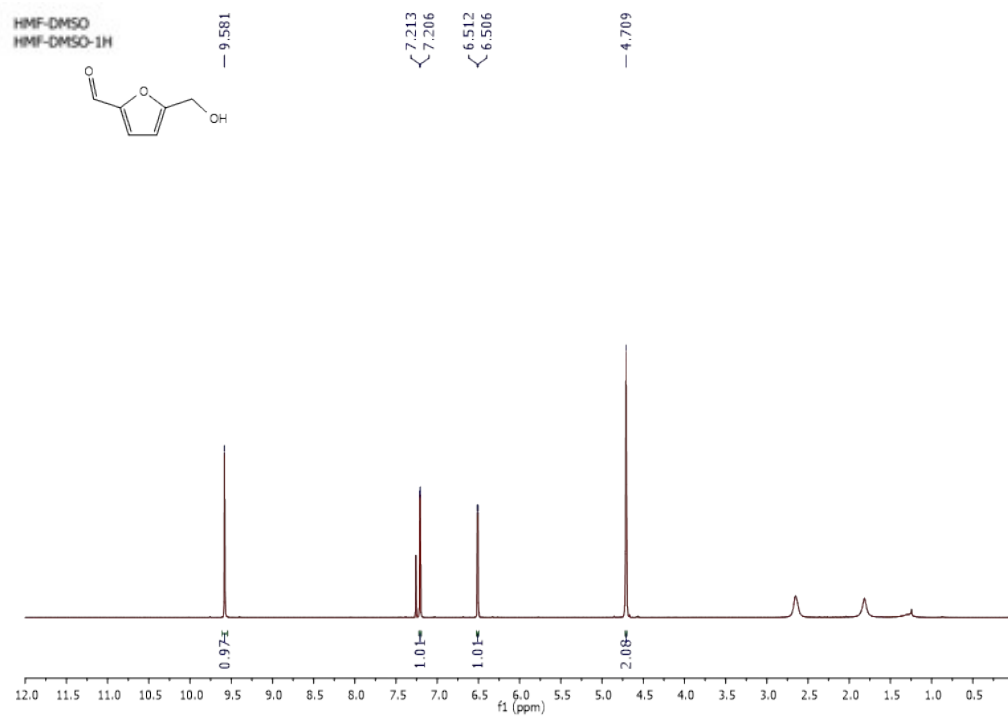

**Figure S6.**  $^1\text{H}$  spectrum of 5-HMF

HRMS (ESI)  $m/z$  calcd for  $[M]^+$  C<sub>6</sub>H<sub>7</sub>O<sub>3</sub> 127.0395, found 127.0379.

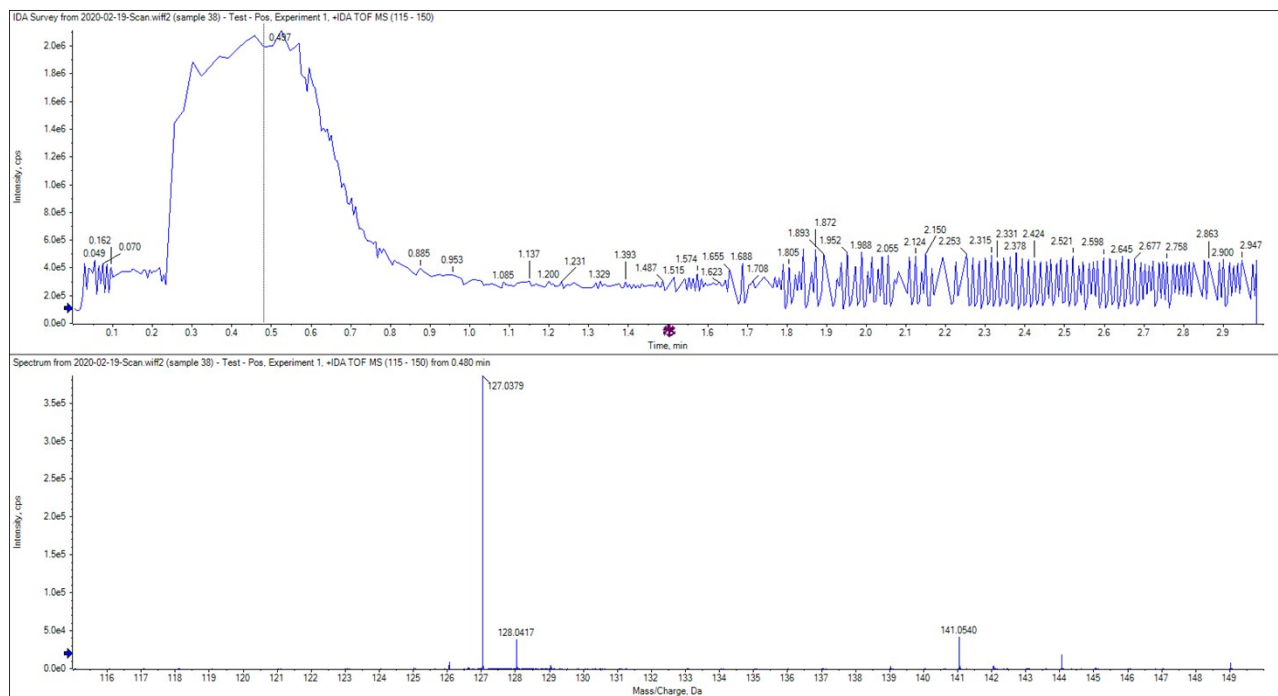

**Figure S7.**HRMS (ESI) of 5-HMF

# Chromatography of HMF

Data File D:\DATA\DA...9\THANG 05\26-05\_HMF\_HU\F\_L\_HMF-QUYEN 2019-05-26 12-10-25\HU1-22H.D  
 Sample Name: Hu1-22h

```

=====
Acq. Operator   : MINH TUAN                      Seq. Line : 18
Acq. Instrument : Instrument 1                    Location  : P1-B-01
Injection Date  : 5/26/2019 7:14:41 PM          Inj       : 1
                                           Inj Volume: 5.000 µl
Different Inj Volume from Sequence !    Actual Inj Volume : 10.000 µl
Acq. Method     : D:\DATA\DATA 2019\THANG 05\26-05_HMF_HU\F_L_HMF-QUYEN 2019-05-26 12-10-25\
                  HMF_COT GL.5-1000PPM-1005.M
Last changed    : 5/26/2019 12:10:24 PM by MINH TUAN
Analysis Method : D:\METHOD\HMF_COT GL.5-1000PPM-210.M
Last changed    : 5/27/2019 6:55:54 PM by MINH TUAN
                  (modified after loading)
=====
  
```

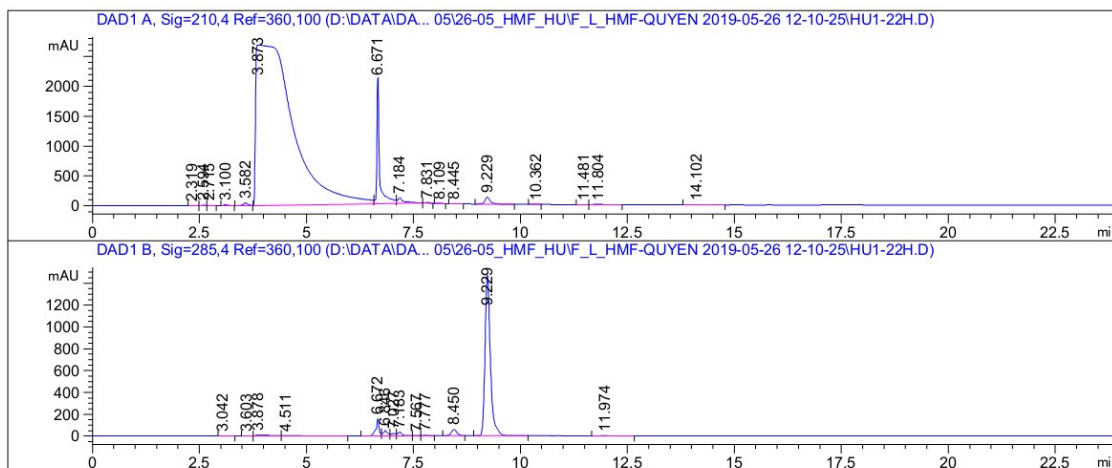

## External Standard Report

```

=====
Sorted By      :      Signal
Calib. Data Modified :    5/27/2019 6:59:38 PM
Multiplier:    :      1.0000
Dilution:      :      1.0000
Do not use Multiplier & Dilution Factor with ISTDs
  
```

Signal 1: DAD1 A, Sig=210,4 Ref=360,100

| RetTime [min] | Type | Area [mAU*s] | Amt/Area   | Amount [ppm] | Grp | Name |
|---------------|------|--------------|------------|--------------|-----|------|
| 9.229         | BB   | 1105.60864   | 1.27825e-1 | 141.32465    |     | HMF  |

Totals : 141.32465

\*\*\* End of Report \*\*\*

# Chromatography of Glucose

D:\Shimadzu LC20\Data 2019\Thang 6\G-F\_HMF\24-06\Hu20-6h\_\_10.lcd

Acquired by : Long - Huong  
 Sample Name : Hu20-6h  
 Vail # : 22  
 Injection Volume : 10 uL  
 Data File Name : Hu20-6h\_\_10.lcd  
 Method File Name : Duong ruou-Duong tu nhien.lcm  
 Data Acquired : 6/24/2019

Chromatogram  
 D:\Shimadzu LC20\Data 2019\Thang 6\G-F\_HMF\24-06\Hu20-6h\_\_10.lcd  
 mV

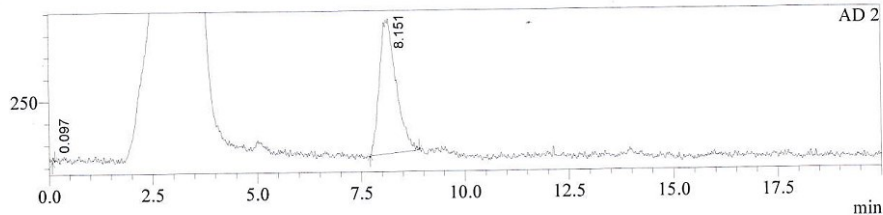

1 AD 2/

## Quantitative Results

AD2

| Name     | Ret. Time | Area    | Conc.   |
|----------|-----------|---------|---------|
| Fructose | 0.000     | 0       | 0.000   |
| Glucose  | 8.151     | 8549373 | 717.135 |

Name : Fructose  
 Function :  $f(x)=9.68401e-005*x+9.12482$   
 Rr1=0.9996235 Rr2=0.9992471  
 MeanRF:0.000117744 RFSD:3.05249e-005 RFRSD:25.9249

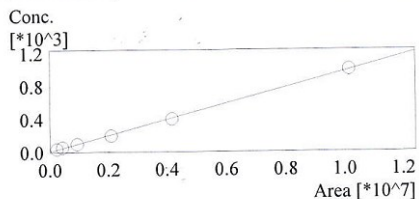

| # | Conc. (Ratio) | MeanArea   | Area     |
|---|---------------|------------|----------|
| 1 | 40.000        | 236027.8   | 236028   |
| 2 | 60.000        | 427127.4   | 427127   |
| 3 | 100.000       | 937680.1   | 937680   |
| 4 | 200.000       | 2096006.7  | 2096007  |
| 5 | 400.000       | 4165866.8  | 4165867  |
| 7 | 1000.000      | 10159282.8 | 10159283 |

Name : Glucose  
 Function :  $f(x)=8.05958e-005*x+28.0907$   
 Rr1=0.9997243 Rr2=0.9994487  
 MeanRF:0.000115062 RFSD:3.73406e-005 RFRSD:32.4526

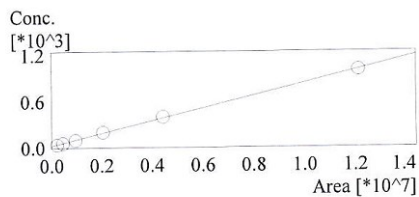

| # | Conc. (Ratio) | MeanArea   | Area     |
|---|---------------|------------|----------|
| 1 | 40.000        | 219411.2   | 219411   |
| 2 | 60.000        | 449078.4   | 449078   |
| 3 | 100.000       | 958276.7   | 958277   |
| 4 | 200.000       | 2053186.9  | 2053187  |
| 5 | 400.000       | 4431582.8  | 4431583  |
| 7 | 1000.000      | 12130896.4 | 12130896 |

D:\Shimadzu LC20\Data 2019\Thang 6\G-F\_HMF\24-06\Hu20-6h\_\_10.lcd

# Chromatography of Fructose

Acquired by : Long - Huong  
 Sample Name : CH10-4h  
 Vial # : 21  
 Injection Volume : 10 uL  
 Data File Name : CH10-4h\_9.lcd  
 Method File Name : Duong ruou-Duong tu nhien.lcm  
 Data Acquired : 6/24/2019

Chromatogram  
 D:\Shimadzu LC20\Data 2019\Thang 6\G-F\_HMF\24-06\CH10-4h\_9.lcd

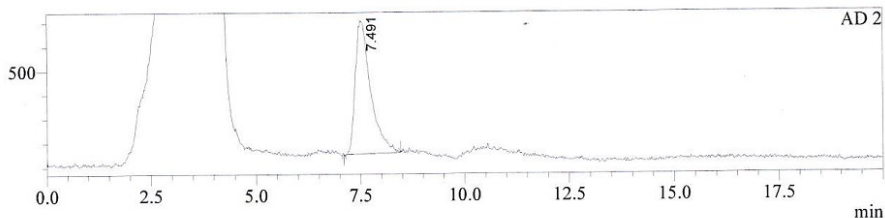

1 AD 2/

## Quantitative Results

| Name     | Ret. Time | Area     | Conc.    |
|----------|-----------|----------|----------|
| Fructose | 7.491     | 14164565 | 1380.822 |
| Glucose  | 0.000     | 0        | 0.000    |

Name : Fructose  
 Function :  $f(x) = 9.68401e-005 * x + 9.12482$   
 $Rr1 = 0.9996235$   $Rr2 = 0.9992471$   
 $MeanRF: 0.000117744$   $RFSD: 3.05249e-005$   $RFRSD: 25.9249$

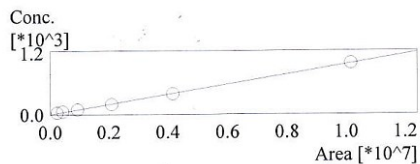

| # | Conc. (Ratio) | MeanArea  | Area    |
|---|---------------|-----------|---------|
| 1 | 40.000        | 236027.8  | 236028  |
| 2 | 60.000        | 427127.4  | 427127  |
| 3 | 100.000       | 937680.1  | 937680  |
| 4 | 200.000       | 2096006.7 | 2096007 |
| 5 | 400.000       | 4165866.8 | 4165867 |

D:\Shimadzu LC20\Data 2019\Thang 6\G-F\_HMF\24-06\CH10-4h\_9.lcd
